# Supplementary material for: Health Utility Value of Overactive Bladder in Japanese Older Adults
Source: medRxiv preprint, doi:10.1101/2024.07.31.24311331, version 2 (2024-08-04)
Supplement: Supplementary materials [file 311331_file05.docx]

**Supplementary materials**

**Method S1** The questionnaires and response options in the survey

1. What is your age?
2. What is your sex?
   1. Male
   2. Female
   3. Others
3. Please provide your current height and weight.
   1. Height (cm):
   2. Weight (kg):
4. What is your annual household income? Please choose one of the following options:

*This includes the total income earned by your entire household in 1 year, including income from work and other sources (such as remittances from children, property income like rent, benefits for older adults).

1. Less than 1 million yen
2. 1 million yen to <2 million yen
3. 2 million yen to <4 million yen
4. 4 million yen to <6 million yen
5. 6 million yen to <10 million yen
6. 10 million yen to <15 million yen
7. 15 million yen to <20 million yen
8. ≥20 million yen
9. Prefer not to answer
10. Do not know
11. Including yourself, how many family members share your household finances?
12. Do you currently have a spouse (husband or wife, including a partner, in a de facto marital relationship)?
    1. No (I am single)
    2. Yes
    3. I had one, but they passed away (widowed).
    4. I had one, but we divorced.
13. Do you currently smoke tobacco habitually?
    1. I smoke almost always.
    2. I smoke occasionally.
    3. I used to smoke in the past, but I do not smoke now.
    4. I do not smoke and have never smoked.
14. Do you currently drink alcohol habitually?
    1. I drink almost always.
    2. I drink occasionally.
    3. I used to drink in the past, but I do not drink now.
    4. I do not drink and have never drunk.
15. Have you experienced any of the following conditions? For each condition, we selected one of the following options:
    1. Never had it
    2. Had (or have) it, but not currently receiving treatment at a hospital
    3. Have it and currently receiving treatment at a hospital
    4. Prefer not to answer

Conditions:

- - 1. Hypertension (high blood pressure)
    2. Diabetes
    3. Hyperlipidemia/hypercholesterolemia
    4. Lower back pain/lumbago
    5. Angina pectoris/myocardial infarction
    6. Cerebral infarction/cerebral hemorrhage
    7. Kidney disease/renal failure
    8. Stress urinary incontinence (involuntary urination when coughing, sneezing, etc.)
    9. Depression
    10. Mental health conditions other than depression (requiring psychiatric or psychosomatic medicine)

OABSS

1. How many times do you typically urinate from waking in the morning until sleeping at night?
   1. ≤7
   2. 8–14
   3. ≥15
2. How many times do you typically wake up to urinate from sleeping at night until waking in the morning?
3. 0
4. 1
5. 2
6. ≥3
7. How often do you have a sudden desire to urinate, which is difficult to defer?
   1. Not at all
   2. Less than once a week
   3. Once a week or more
   4. About once a day
   5. 4 times a day
   6. 5 times a day or more
8. How often do you leak urine because you cannot defer the sudden desire to urinate?
   1. Not at all
   2. Less than once a week
   3. Once a week or more
   4. About once a day
   5. 4 times a day
   6. 5 times a day or more

In addition to the above questions, we used the Japanese versions of the EQ-5D-5L and EQ VAS. For information on the EQ-5D-5L and EQ VAS, please refer to the user guide available on the EuroQol website (https://euroqol. org/information-and-support/documentation/user-guides).

**Table S1** Baseline characteristics of the sex subgroups

| **Variables** | **Category** | **Male (n=516)** | | **Female (n=478)** | |
| --- | --- | --- | --- | --- | --- |
| **n** | **%** | **n** | **%** |
| Age | Mean (SD) | 73.3 | (5.3) | 73.1 | (5.3) |
|  | Median [IQR] | 75 | [68.5–77] | 74 | [68–76] |
| BMI | Mean (SD) | 23.1 | (2.8) | 21.9 | (3.8) |
|  | Median [IQR] | 22.9 | [21.3–23.7] | 21.6 | [19.7–23.7] |
| Educational attainment | College graduate or more | 322 | 62.4 | 235 | 49.2 |
| Equivalent household income | Lower half | 220 | 42.6 | 189 | 39.5 |
|  | Upper half | 201 | 39.0 | 159 | 33.3 |
|  | Decline to answer | 95 | 18.4 | 130 | 27.2 |
| Smoking status | Never | 97 | 18.8 | 380 | 79.5 |
|  | Past | 341 | 66.1 | 69 | 14.4 |
|  | Current | 78 | 15.1 | 29 | 6.1 |
| Alcohol consumption | Never | 52 | 10.1 | 194 | 40.6 |
|  | Past | 126 | 24.4 | 103 | 21.6 |
|  | Current | 338 | 65.5 | 181 | 37.9 |
| Presence of comorbidities | Hypertension | 288 | 55.8 | 198 | 41.4 |
|  | Dyslipidemia | 196 | 38.0 | 211 | 44.1 |
|  | Diabetes | 130 | 25.2 | 36 | 7.5 |
|  | Low back pain | 316 | 61.2 | 250 | 52.3 |
|  | Ischemic heart disease | 64 | 12.4 | 27 | 5.7 |
|  | Stroke | 48 | 9.3 | 15 | 3.1 |
|  | Chronic kidney disease | 21 | 4.1 | 15 | 3.1 |
|  | Stress urinary incontinence | 22 | 4.3 | 92 | 19.3 |
|  | Depression | 30 | 5.8 | 20 | 4.2 |
|  | Other psychiatric disorders | 21 | 4.1 | 23 | 4.8 |
| OABSS | Mean (SD) | 3.1 | (2.3) | 2.2 | (1.9) |
|  | Median [IQR] | 3 | [1–4] | 2 | [1–3] |
| HUV | Mean (SD) | 0.91 | (0.11) | 0.90 | (0.12) |
|  | Median [IQR] | 0.89 | [0.84–1] | 0.89 | [0.83–1] |

**Note.** BMI, body mass index; HUV, health utility value; IQR, interquartile range; OABSS, Overactive Bladder Symptom Scale; SD, standard deviation.

**Table S2** Baseline characteristics of the age subgroups

| **Variables** | **Category** | **65 to 74 (n=492)** | | **75 to 94 (n=502)** | |
| --- | --- | --- | --- | --- | --- |
| **n** | **%** | **n** | **%** |
| Age | Mean (SD) | 68.7 | (2.9) | 77.7 | (2.9) |
|  | Median [IQR] | 68 | [66–71] | 77 | [75–79] |
| Sex | Male | 250 | 50.8 | 266 | 53.0 |
| BMI | Mean (SD) | 22.5 | (3.2) | 22.6 | (3.5) |
|  | Median [IQR] | 22.5 | [20.3–24.3] | 22.2 | [20.8–24.3] |
| Educational attainment | College graduate or more | 309 | 62.8 | 248 | 49.4 |
| Equivalent household income | Lower half | 183 | 37.2 | 226 | 45.0 |
|  | Upper half | 184 | 37.4 | 176 | 35.1 |
|  | Decline to answer | 125 | 25.4 | 100 | 19.9 |
| Smoking status | Never | 229 | 46.5 | 248 | 49.4 |
|  | Past | 197 | 40.0 | 213 | 42.4 |
|  | Current | 66 | 13.4 | 41 | 8.2 |
| Alcohol consumption | Never | 115 | 23.4 | 131 | 26.1 |
|  | Past | 116 | 23.6 | 113 | 22.5 |
|  | Current | 261 | 53.1 | 258 | 51.4 |
| Presence of comorbidities | Hypertension | 214 | 43.5 | 272 | 54.2 |
|  | Dyslipidemia | 203 | 41.3 | 204 | 40.6 |
|  | Diabetes | 83 | 16.9 | 83 | 16.5 |
|  | Low back pain | 273 | 55.5 | 293 | 58.4 |
|  | Ischemic heart disease | 39 | 7.9 | 52 | 10.4 |
|  | Stroke | 28 | 5.7 | 35 | 7.0 |
|  | Chronic kidney disease | 13 | 2.6 | 23 | 4.6 |
|  | Stress urinary incontinence | 52 | 10.6 | 62 | 12.4 |
|  | Depression | 30 | 6.1 | 20 | 4.0 |
|  | Other psychiatric disorders | 25 | 5.1 | 19 | 3.8 |
| OABSS | Mean (SD) | 2.4 | (2.0) | 2.9 | (2.3) |
|  | Median [IQR] | 2 | [1–3] | 2 | [1–4] |
| HUV | Mean (SD) | 0.92 | (0.10) | 0.89 | (0.12) |
|  | Median [IQR] | 0.89 | [0.87–1] | 0.89 | [0.83–1] |

**Note.** BMI, body mass index; HUV, health utility value; IQR, interquartile range; OABSS, Overactive Bladder Symptom Scale; SD, standard deviation.

**Table S3** Prevalence of OAB and utility values according to sex or age subgroups

| **Population** | **OAB severity*** | **n (%)** | **Mean HUV (SD)** | **Median HUV [IQR]** |
| --- | --- | --- | --- | --- |
| **Sex subgroups** |  |  |  |  |
| **Male (n=516)** | **Non-OAB** | **409 (79.3)** | **0.917 (0.104)** | **0.895 [0.875–1]** |
|  | **Any OAB** | **107 (20.7)** | **0.872 (0.128)** | **0.895 [0.823–1]** |
|  | Mild OAB | 43 (8.3) | 0.882 (0.119) | 0.895 [0.823–1] |
|  | Moderate-to-severe OAB | 64 (12.4) | 0.865 (0.134) | 0.895 [0.811–1] |
| **Female (n=478)** | **Non-OAB** | **427 (89.3)** | **0.909 (0.107)** | **0.894 [0.867–1]** |
|  | **Any OAB** | **51 (10.7)** | **0.821 (0.173)** | **0.831 [0.759–0.895]** |
|  | Mild OAB | 28 (5.9) | 0.862 (0.150) | 0.895 [0.824–1] |
|  | Moderate-to-severe OAB | 23 (4.8) | 0.770 (0.189) | 0.823 [0.670–0.895] |
| **Age subgroups** |  |  |  |  |
| **65–74 years (n=492)** | **Non-OAB** | **423 (86.0)** | **0.920 (0.100)** | **0.895 [0.875–1]** |
|  | **Any OAB** | **69 (14.0)** | **0.889 (0.130)** | **0.895 [0.823–1]** |
|  | Mild OAB | 37 (7.5) | 0.916 (0.091) | 0.895 [0.829–1] |
|  | Moderate-to-severe OAB | 32 (6.5) | 0.858 (0.160) | 0.895 [0.766–1] |
| **75–94 years (n=502)** | **Non-OAB** | **413 (82.3)** | **0.907 (0.111)** | **0.894 [0.867–1]** |
|  | **Any OAB** | **89 (17.7)** | **0.829 (0.152)** | **0.831 [0.776–0.895]** |
|  | Mild OAB | 34 (6.8) | 0.829 (0.153) | 0.849 [0.780–0.895] |
|  | Moderate-to-severe OAB | 55 (11.0) | 0.830 (0.152) | 0.831 [0.759–1] |

**Note.** HUV, health utility value; IQR, interquartile range; OAB, overactive bladder; SD, standard deviation.

*Mild OAB is defined as domain 3 (urgency) of overactive bladder symptom score (OABSS)≥2 and total score of 3≤OABSS≤5, and moderate-to-severe OAB is defined as domain 3 of OABSS≥2 and total score of 6≤OABSS≤15.

**Table S4** Proportion and utility values of each score according to the OABSS domains

| **Domain** | **Score** | **n (%)** | **Mean HUV (SD)** | **Median HUV [IQR]** |
| --- | --- | --- | --- | --- |
| **Daytime frequency** | 0 | 549 (55.2) | 0.905 (0.113) | 0.895 [0.831–1] |
|  | 1 | 430 (43.3) | 0.905 (0.114) | 0.895 [0.844–1] |
|  | 2 | 15 (1.5) | 0.854 (0.158) | 0.895 [0.759–1] |
| **Nighttime frequency** | 0 | 195 (19.6) | 0.924 (0.096) | 1 [0.895–1] |
|  | 1 | 463 (46.6) | 0.909 (0.106) | 0.895 [0.867–1] |
|  | 2 | 228 (22.9) | 0.894 (0.116) | 0.895 [0.831–1] |
|  | 3 | 108 (10.9) | 0.869 (0.160) | 0.895 [0.823–1] |
| **Urgency** | 0 | 557 (56.0) | 0.920 (0.096) | 0.895 [0.875–1] |
|  | 1 | 279 (28.1) | 0.899 (0.121) | 0.895 [0.823–1] |
|  | 2 | 88 (8.9) | 0.866 (0.150) | 0.895 [0.823–1] |
|  | 3 | 42 (4.2) | 0.843 (0.141) | 0.873 [0.772–1] |
|  | 4 | 22 (2.2) | 0.842 (0.148) | 0.856 [0.759–1] |
|  | 5 | 6 (0.6) | 0.825 (0.117) | 0.831 [0.708–0.895] |
| **Urgency incontinence** | 0 | 818 (82.3) | 0.910 (0.108) | 0.895 [0.867–1] |
|  | 1 | 132 (13.3) | 0.896 (0.120) | 0.895 [0.831–1] |
|  | 2 | 27 (2.7) | 0.804 (0.175) | 0.831 [0.708–0.895] |
|  | 3 | 12 (1.2) | 0.842 (0.139) | 0.881 [0.741–0.947] |
|  | 4 | 5 (0.5) | 0.753 (0.185) | 0.759 [0.641–0.844] |
|  | 5 | 0 (0) | 0 (0) | 0 [0–0] |

**Note.** HUV, health utility value; IQR, interquartile range; OABSS, Overactive Bladder Symptom Score; SD, standard deviation.
